# Supplementary material for: Micro-/Nanofibrillated Cellulose-Based Coating Formulations: A Solution for Improving Paper Printing Quality
Source: MDPI journal article supplement (doi:10.3390/nano12162853), 2022-08-18
Supplement: s1 [file s1]

# Micro-/Nanofibrillated Cellulose-Based Coating Formulations: A Solution for Improving Paper Printing Quality

Mohit Sharma <sup>1,\*</sup>, Roberto Aguado <sup>2</sup>, Dina Murtinho <sup>3</sup>, Artur J. M. Valente<sup>3</sup> and Paulo J. T. Ferreira<sup>1</sup>

<sup>1</sup> University of Coimbra, CIEPQPF, Department of Chemical Engineering, Rua Sílvia Lima, Polo II–Pinhal de Marrocos, 3030-790 Coimbra, Portugal

<sup>2</sup> LEPAMAP-PRODIS Research Group, University of Girona, M Aurélie Capmany 61, 17003 Girona, Spain

<sup>3</sup> University of Coimbra, CQC, Department of Chemistry, Rua Larga, 3004-535 Coimbra, Portugal

\* Correspondence: mohit@eq.uc.pt

This supplementary document contains dynamic water contact analysis (DWCA) results. Although regarded as supplementary, this information is necessary to support some claims given along the article.

## S1 Dynamic water contact analysis (DCA)

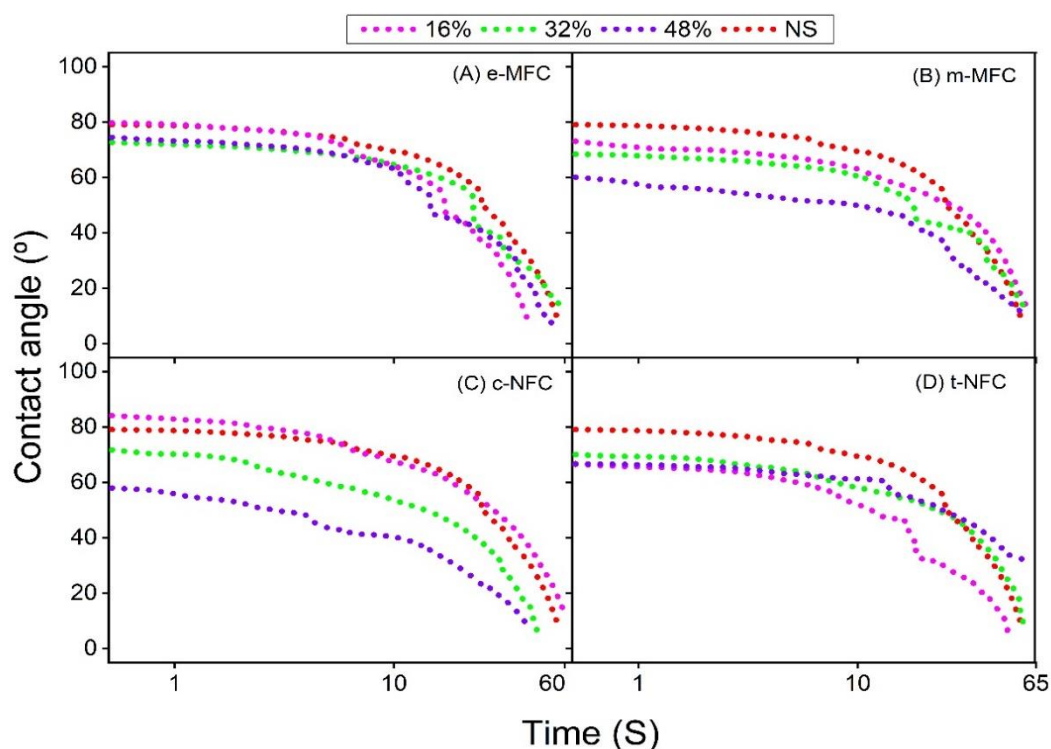

**Figure S1.** Dynamic contact angle for papers coated using different concentration (w/w %) of e-MFC (A), m-MFC (B), c-NFC (C) and t-NFC (D) for starch-based coatings

Figure S1 shows the DWCA plot, i.e., the time profile of the water contact angle, for M/NFCs coated samples (Refer Table 2 in main manuscript for detail of used concentrations). Likewise, DWCA of combined coatings

using M/NFCs/starch, Starch betainate (SB), Pluronics and PCC (Refer Table 3 in main manuscript for detail of used concentrations) is displayed in Figure S2.

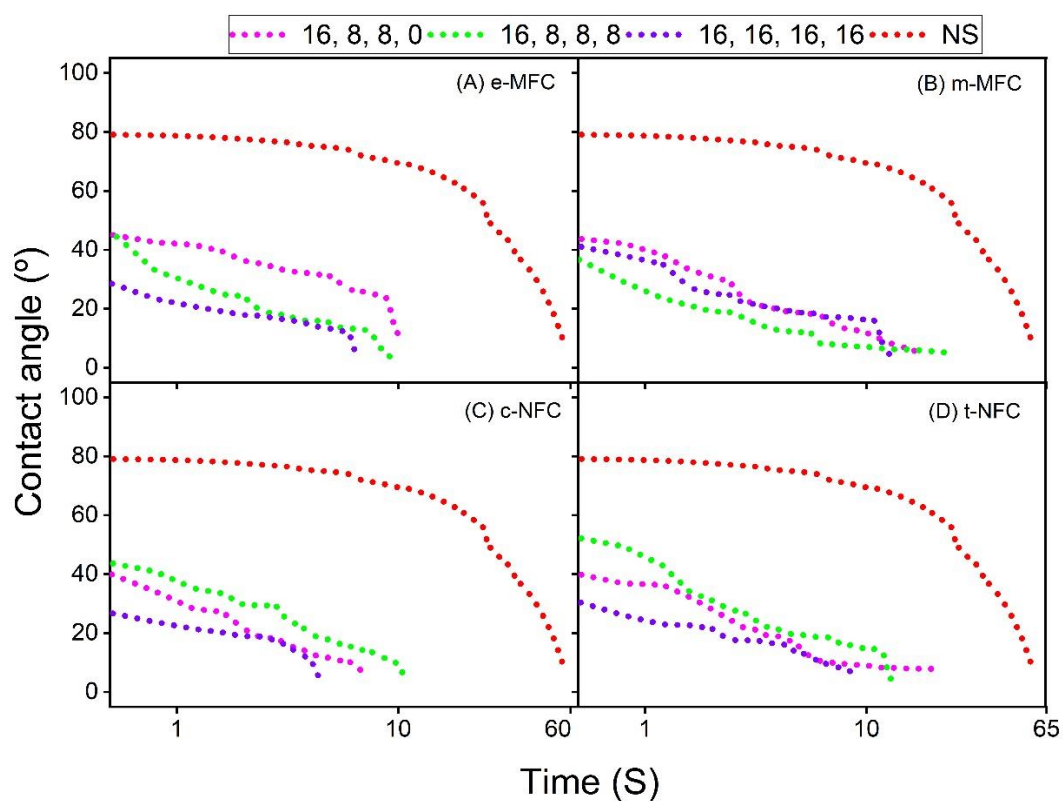

**Figure S2.** Dynamic contact angle for papers coated using different concentration (w/w %) of SB, Pluronics P123 and PCC for e-MFC (A), m-MFC (B), c-NFC (C) and t-NFC (D) starch-based coatings
